# Supplementary material for: Solvation effects on wavenumbers and absorption intensities of the OH-stretch vibration in phenolic compounds – electrical- and mechanical anharmonicity via a combined DFT/Numerov approach
Source: Royal Society of Chemistry journal article supplement (doi:10.1039/c9cp05594k), 2020-01-01
Supplement: c9cp05594k1.pdf [file c9cp05594k1.pdf]

**Solvation Effects on Wavenumbers and Absorption  
Intensities of the OH-Stretch Vibration in Phenolic  
Compounds – Electrical- and Mechanical  
Anharmonicity *via* a combined DFT/Numerov  
Approach – Supporting Information**

*Manuel J. Schuler and Thomas S. Hofer\**

Theoretical Chemistry Division, Institute of General, Inorganic and Theoretical Chemistry  
Center for Chemistry and Biomedicine  
University of Innsbruck, Innrain 80-82, A-6020 Innsbruck, Austria  
Tel.: +43-512-507-57111, Fax: +43-512-507-57199

*Yusuke Morisawa*

Department of Chemistry  
School of Science and Engineering, Kindai University, Kowakae  
Higashi-Osaka, Osaka, 577-8502, Japan  
Tel.: +81-0965-53-1211, Fax: +81-0965-53-1219

*Yoshisuke Futami*

Department of Biological and Chemical Systems Engineering  
National Institute of Technology, Kumamoto College,  
Yatsushiro, Kumamoto, 866-8501, Japan  
Tel.: +81-0965-53-1211, Fax: +81-0965-53-1219

*Christian W. Huck*

Institute of Analytical Chemistry and Radiochemistry

Center for Chemistry and Biomedicine

University of Innsbruck, Innrain 80-82, A-6020 Innsbruck, Austria

Tel.: +43-512-507-57304, Fax: +43-512-507-53399

*Yukihiro Ozaki*<sup>†</sup>

Department of Chemistry,

School of Science and Technology

Kwansei Gakuin University, Sanda, Hyogo 669-1337, Japan

Tel.: +81-798-71-5206, Fax: +81-798-71-5206

May 13, 2020

---

\*Corresponding author (theoretical) – E-Mail: t.hofer@uibk.ac.at

<sup>†</sup>Corresponding author (experimental) – E-Mail: yukiz89016@gmail.com

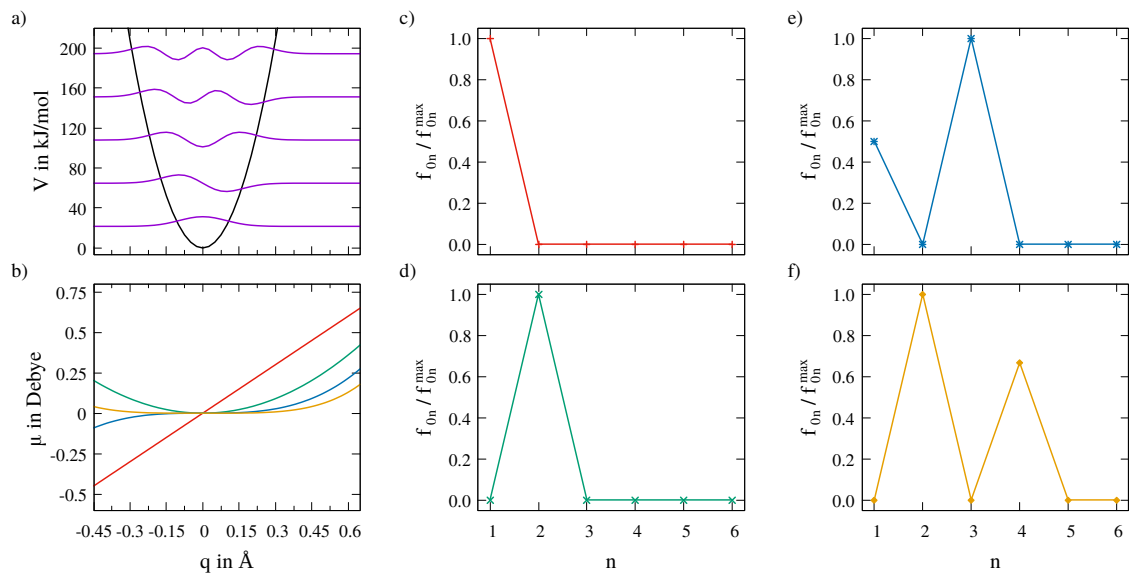

Figure S1: a) Potential (black) and vibrational eigenstates (purple) of the harmonic oscillator. b) Dipole moment change with idealised linear (red), quadratic (green), cubic (blue) and quartic (orange) dependence. c) to f) Oscillator strengths normalised to their respective largest values ( $f_{0n}/f_{0n}^{\max}$ ) for the linear (c), quadratic (d), cubic (e) and quartic (f) dipole moment curves.

Table S1: Wavenumbers  $\nu_{0n}$  in  $\text{cm}^{-1}$  and associated oscillator strengths  $f_{0n}$  obtained *via* the Numerov approach at B3LYP/6-311++G(3df,3pd) level in different environments for phenol with and without dispersion correction GD3BJ applied.

|               |            | CCl <sub>4</sub> |                      |          |                      |          |                      | n-Hexane |                      |          |                      |          |            |          |            |          |
|---------------|------------|------------------|----------------------|----------|----------------------|----------|----------------------|----------|----------------------|----------|----------------------|----------|------------|----------|------------|----------|
|               |            | Vacuum           |                      |          | Implicit             |          |                      | Explicit |                      |          | Implicit             |          |            | Explicit |            |          |
| $n$           | $\nu_{0n}$ | $f_{0n}$         | $\nu_{0n}$           | $f_{0n}$ | $\nu_{0n}$           | $f_{0n}$ | $\nu_{0n}$           | $f_{0n}$ | $\nu_{0n}$           | $f_{0n}$ | $\nu_{0n}$           | $f_{0n}$ | $\nu_{0n}$ | $f_{0n}$ | $\nu_{0n}$ | $f_{0n}$ |
|               | 1          | 3665             | $9.76 \cdot 10^{-6}$ | 3637     | $1.70 \cdot 10^{-5}$ | 3632     | $3.78 \cdot 10^{-5}$ | 3642     | $1.54 \cdot 10^{-5}$ | 3664     | $8.87 \cdot 10^{-6}$ |          |            |          |            |          |
| Phenol        | 2          | 7167             | $8.78 \cdot 10^{-7}$ | 7111     | $9.62 \cdot 10^{-7}$ | 7094     | $6.23 \cdot 10^{-7}$ | 7122     | $9.44 \cdot 10^{-7}$ | 7166     | $8.02 \cdot 10^{-7}$ |          |            |          |            |          |
| B3LYP         | 3          | 10513            | $5.20 \cdot 10^{-8}$ | 10431    | $6.16 \cdot 10^{-8}$ | 10392    | $5.07 \cdot 10^{-8}$ | 10447    | $6.04 \cdot 10^{-8}$ | 10511    | $4.90 \cdot 10^{-8}$ |          |            |          |            |          |
|               | 4          | 13705            | $4.07 \cdot 10^{-9}$ | 13599    | $6.40 \cdot 10^{-9}$ | 13529    | $4.91 \cdot 10^{-9}$ | 13621    | $6.15 \cdot 10^{-9}$ | 13703    | $4.01 \cdot 10^{-9}$ |          |            |          |            |          |
|               | 1          | 3664             | $9.47 \cdot 10^{-6}$ | 3636     | $1.66 \cdot 10^{-5}$ | 3601     | $5.24 \cdot 10^{-5}$ | 3641     | $1.53 \cdot 10^{-5}$ | 3662     | $9.69 \cdot 10^{-6}$ |          |            |          |            |          |
| Phenol        | 2          | 7158             | $8.68 \cdot 10^{-7}$ | 7101     | $9.53 \cdot 10^{-7}$ | 7009     | $3.89 \cdot 10^{-7}$ | 7113     | $9.47 \cdot 10^{-7}$ | 7154     | $8.06 \cdot 10^{-7}$ |          |            |          |            |          |
| B3LYP + GD3BJ | 3          | 10483            | $5.23 \cdot 10^{-8}$ | 10400    | $6.15 \cdot 10^{-8}$ | 10215    | $4.42 \cdot 10^{-8}$ | 10417    | $6.13 \cdot 10^{-8}$ | 10473    | $4.70 \cdot 10^{-8}$ |          |            |          |            |          |
|               | 4          | 13652            | $4.17 \cdot 10^{-9}$ | 13544    | $6.53 \cdot 10^{-9}$ | 13240    | $5.88 \cdot 10^{-9}$ | 13567    | $6.32 \cdot 10^{-9}$ | 13635    | $3.66 \cdot 10^{-9}$ |          |            |          |            |          |

Table S2: Theoretical wavenumbers in  $\text{cm}^{-1}$  for phenol obtained *via* the Numerov procedure at B3LYP/6-311++G(3df,3pd) level with and without GD3BJ dispersion correction. The deviations with respect to the experimental values in percent are given in parenthesis. The parameters  $k$ ,  $d$  (in  $\text{cm}^{-1}$ ) and  $R$  are obtained *via* linear regression between the experimental data (x-axis) and the respective theoretical values (y-axis).

|                                   |            | experimental | vacuum         | implicit       | explicit       |
|-----------------------------------|------------|--------------|----------------|----------------|----------------|
| CCl <sub>4</sub><br>B3LYP         | $\nu_{01}$ | 3612         | 3665 (1.47 %)  | 3637 (0.69 %)  | 3632 (0.55 %)  |
|                                   | $\nu_{02}$ | 7055         | 7167 (1.59 %)  | 7111 (0.79 %)  | 7094 (0.55 %)  |
|                                   | $\nu_{03}$ | 10327        | 10513 (1.80 %) | 10431 (1.01 %) | 10392 (0.63 %) |
|                                   | $\nu_{04}$ | 13435        | 13705 (2.01 %) | 13599 (1.22 %) | 13529 (0.70 %) |
|                                   | $k$        |              | 1.022          | 1.014          | 1.008          |
|                                   | $d$        |              | -34.91         | -34.54         | -10.53         |
|                                   | $R$        |              | 0.9999976      | 0.9999974      | 0.9999996      |
| CCl <sub>4</sub><br>B3LYP + GD3BJ | $\nu_{01}$ | 3612         | 3664 (1.44 %)  | 3636 (0.66 %)  | 3601 (0.30 %)  |
|                                   | $\nu_{02}$ | 7055         | 7158 (1.47 %)  | 7101 (0.65 %)  | 7009 (0.65 %)  |
|                                   | $\nu_{03}$ | 10327        | 10483 (1.52 %) | 10400 (0.71 %) | 10215 (1.08 %) |
|                                   | $\nu_{04}$ | 13435        | 13652 (1.62 %) | 13544 (0.82 %) | 13240 (1.46 %) |
|                                   | $k$        |              | 1.017          | 1.009          | 0.981          |
|                                   | $d$        |              | -11.76         | -11.51         | 71.27          |
|                                   | $R$        |              | 0.9999995      | 0.9999993      | 0.9999926      |
| n-Hexane<br>B3LYP                 | $\nu_{01}$ | 3622         | 3665 (1.19 %)  | 3642 (0.55 %)  | 3664 (1.15 %)  |
|                                   | $\nu_{02}$ | 7074         | 7167 (1.31 %)  | 7122 (0.68 %)  | 7166 (1.30 %)  |
|                                   | $\nu_{03}$ | 10358        | 10513 (1.50 %) | 10447 (0.86 %) | 10511 (1.47 %) |
|                                   | $\nu_{04}$ | 13472        | 13705 (1.73 %) | 13621 (1.11 %) | 13703 (1.71 %) |
|                                   | $k$        |              | 1.019          | 1.013          | 1.019          |
|                                   | $d$        |              | -34.68         | -35.52         | -35.33         |
|                                   | $R$        |              | 0.9999973      | 0.9999970      | 0.9999973      |
| n-Hexane<br>B3LYP + GD3BJ         | $\nu_{01}$ | 3622         | 3664 (1.16 %)  | 3641 (0.54 %)  | 3662 (1.11 %)  |
|                                   | $\nu_{02}$ | 7074         | 7158 (1.20 %)  | 7113 (0.55 %)  | 7154 (1.13 %)  |
|                                   | $\nu_{03}$ | 10358        | 10483 (1.22 %) | 10417 (0.57 %) | 10473 (1.11 %) |
|                                   | $\nu_{04}$ | 13472        | 13652 (1.34 %) | 13566 (0.71 %) | 13635 (1.21 %) |
|                                   | $k$        |              | 1.014          | 1.008          | 1.012          |
|                                   | $d$        |              | -11.52         | -11.49         | -6.46          |
|                                   | $R$        |              | 0.9999993      | 0.9999991      | 0.9999995      |

Table S3: Theoretical wavenumbers in  $\text{cm}^{-1}$  for 2,6-difluorophenol obtained *via* the Numerov procedure at B3LYP/6-311++G(3df,3pd) level. The deviations with respect to the experimental values in percent are given in parenthesis. The parameters  $k$ ,  $d$  (in  $\text{cm}^{-1}$ ) and  $R$  are obtained *via* linear regression between the experimental data (x-axis) and the respective theoretical values (y-axis).

|                  | experimental | vacuum | implicit       | explicit       |                |
|------------------|--------------|--------|----------------|----------------|----------------|
| CCl <sub>4</sub> | $\nu_{01}$   | 3587   | 3639 (1.46 %)  | 3614 (0.76 %)  | 3599 (0.33 %)  |
|                  | $\nu_{02}$   | 7015   | 7119 (1.48 %)  | 7067 (0.74 %)  | 7029 (0.20 %)  |
|                  | $\nu_{03}$   | 10271  | 10443 (1.67 %) | 10367 (0.93 %) | 10294 (0.22 %) |
|                  | $\nu_{04}$   | 13360  | 13616 (1.92 %) | 13516 (1.17 %) | 13396 (0.27 %) |
|                  | $k$          |        | 1.021          | 1.013          | 1.003          |
|                  | $d$          |        | -32.09         | -29.66         | -0.401         |
|                  | $R$          |        | 0.9999963      | 0.9999964      | 0.9999996      |
| n-Hexane         | $\nu_{01}$   | 3598   | 3639 (1.15 %)  | 3619 (0.59 %)  | –              |
|                  | $\nu_{02}$   | 7028   | 7119 (1.29 %)  | 7077 (0.70 %)  | –              |
|                  | $\nu_{03}$   | 10292  | 10443 (1.46 %) | 10382 (0.88 %) | –              |
|                  | $\nu_{04}$   | 13395  | 13616 (1.65 %) | 13536 (1.05 %) | –              |
|                  | $k$          |        | 1.018          | 1.012          | –              |
|                  | $d$          |        | -31.24         | -29.34         | –              |
|                  | $R$          |        | 0.9999983      | 0.9999983      | –              |

Table S4: Relevant distances and angles of the vacuum, implicit  $\text{CCl}_4$  and explicit  $\text{CCl}_4$  systems. The respective atom numbers are shown in Figure S2.

|                                 |                                 | vacuum | implicit | explicit |
|---------------------------------|---------------------------------|--------|----------|----------|
| $\text{CCl}_4$<br>B3LYP         | $r(1 - 2)$ in $\text{\AA}$      | 0.96   | 0.96     | 0.96     |
|                                 | $\alpha(3 - 1 - 2)$ in degree   | 109.88 | 109.93   | 110.35   |
|                                 | $r(1 - 17)$ in $\text{\AA}$     |        |          | 3.09     |
|                                 | $r(1 - 18)$ in $\text{\AA}$     |        |          | 4.85     |
|                                 | $\alpha(18 - 17 - 1)$ in degree |        |          | 171.07   |
|                                 | $r(2 - 12)$ in $\text{\AA}$     |        |          | 2.72     |
|                                 | $\alpha(1 - 2 - 12)$ in degree  |        |          | 144.95   |
|                                 | $r(2 - 15)$ in $\text{\AA}$     |        |          | 3.92     |
|                                 | $\alpha(1 - 2 - 15)$ in degree  |        |          | 156.72   |
|                                 | $r(2 - 16)$ in $\text{\AA}$     |        |          | 3.92     |
| $\alpha(1 - 2 - 16)$ in degree  |                                 |        | 156.58   |          |
| $\text{CCl}_4$<br>B3LYP + GD3BJ | $r(1 - 2)$ in $\text{\AA}$      | 0.96   | 0.96     | 0.96     |
|                                 | $\alpha(3 - 1 - 2)$ in degree   | 109.78 | 109.83   | 110.21   |
|                                 | $r(1 - 17)$ in $\text{\AA}$     |        |          | 3.06     |
|                                 | $r(1 - 18)$ in $\text{\AA}$     |        |          | 4.70     |
|                                 | $\alpha(18 - 17 - 1)$ in degree |        |          | 152.65   |
|                                 | $r(2 - 12)$ in $\text{\AA}$     |        |          | 2.52     |
|                                 | $\alpha(1 - 2 - 12)$ in degree  |        |          | 159.06   |
|                                 | $r(2 - 15)$ in $\text{\AA}$     |        |          | 3.69     |
|                                 | $\alpha(1 - 2 - 15)$ in degree  |        |          | 144.74   |
|                                 | $r(2 - 16)$ in $\text{\AA}$     |        |          | 3.73     |
| $\alpha(1 - 2 - 16)$ in degree  |                                 |        | 146.36   |          |

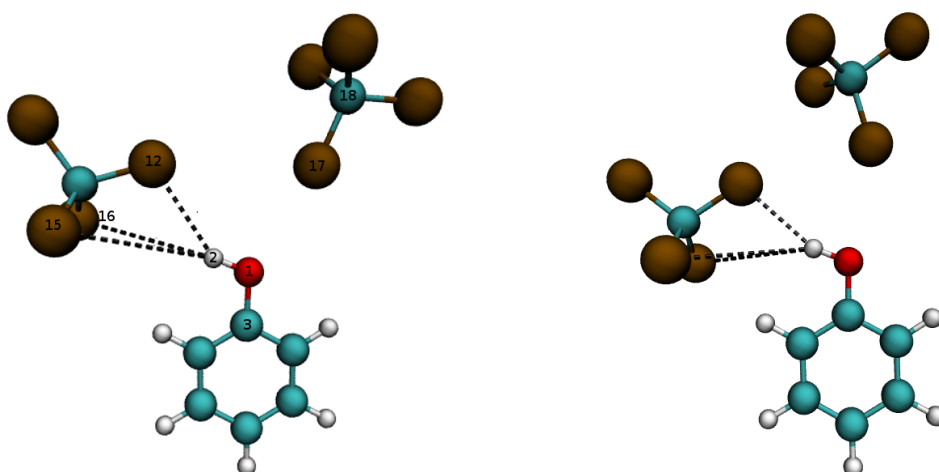

Figure S2: Structure of the explicit carbon tetrachloride system without (left) and with (right) GD3BJ dispersion correction applied.

Table S5: Structural data of the explicit n-hexane systems with and without dispersion correction.

|               |               |           | vacuum | implicit | explicit |
|---------------|---------------|-----------|--------|----------|----------|
| n-Hexane      | $r(OH)$       | in Å      | 0.96   | 0.96     | 0.96     |
| B3LYP         | $\alpha(COH)$ | in degree | 109.88 | 109.94   | 109.89   |
| n-Hexane      | $r(OH)$       | in Å      | 0.96   | 0.96     | 0.96     |
| B3LYP + GD3BJ | $\alpha(COH)$ | in degree | 109.78 | 109.83   | 109.78   |

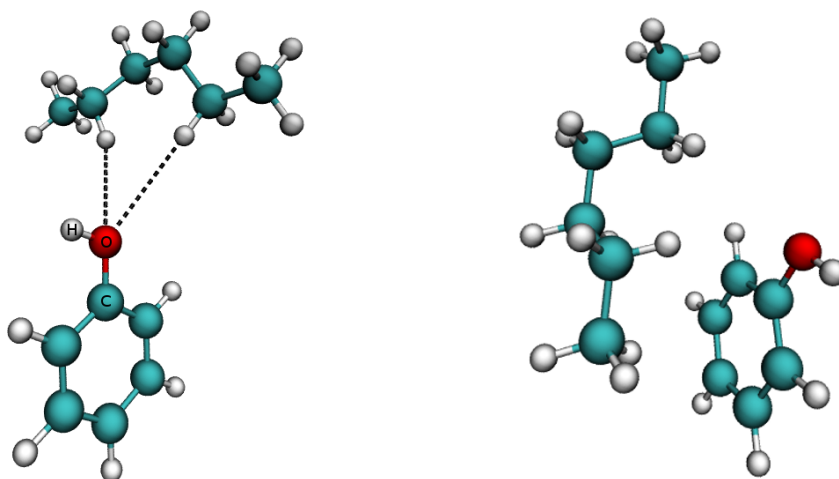

Figure S3: Structures of the explicit n-hexane system with (right) and without (left) dispersion correction. Due to the very weak interaction energies the explicit n-hexane system geometry is very sensitive to dispersion correction, shifting the n-hexane molecule towards the aromatic moiety.
